# Supplementary material for: The lncRNA Sweetheart regulates compensatory cardiac hypertrophy after myocardial injury in murine males
Source: Springer Nature journal article supplement (doi:10.1038/s41467-023-42760-y), 2023-11-02
Supplement: MOESM1 [file 41467_2023_42760_MOESM1_ESM.pdf]

## Supplementary Information

### The lncRNA *Sweetheart* regulates compensatory cardiac hypertrophy after myocardial injury in murine males

Sandra Rogala<sup>1,2</sup>, Tamer Ali<sup>1,2,3</sup>, Maria-Theodora Melissari<sup>1</sup>, Sandra Währisch<sup>4</sup>, Peggy Schuster<sup>1</sup>, Alexandre Sarre<sup>5</sup>, Rebeca Cordellini Emídio<sup>1</sup>, Thomas Boettger<sup>6</sup>, Eva-Maria Rogg<sup>1</sup>, Jaskiran Kaur<sup>1</sup>, Jaya Krishnan<sup>1</sup>, Gabrijela Dumbović<sup>1</sup>, Stefanie Dimmeler<sup>1</sup>, Samir Ounzain<sup>7,8</sup>, Thierry Pedrazzini<sup>7</sup>, Bernhard G Herrmann<sup>4</sup> and Phillip Grote<sup>1,2,9\*</sup>

<sup>1</sup> Institute of Cardiovascular Regeneration, Centre for Molecular Medicine, Goethe University, Theodor-Stern-Kai 7, 60590 Frankfurt am Main, Germany

<sup>2</sup> Georg-Speyer-Haus, Institute for Tumor Biology and Experimental Therapy, Paul-Ehrlich-Str. 42-44, 60596 Frankfurt am Main, Germany

<sup>3</sup> Faculty of Science, Benha University, Benha 13518, Egypt

<sup>4</sup> Department of Developmental Genetics, Max Planck Institute for Molecular Genetics, Ihnestr. 63–73, 14195 Berlin, Germany

<sup>5</sup> Cardiovascular Assessment Facility, University of Lausanne Medical School, Lausanne, Switzerland

<sup>6</sup> Department of Cardiac Development and Remodelling, Max Planck Institute for Heart- and Lung Research, 61231 Bad Nauheim, Germany

<sup>7</sup> Experimental Cardiology Unit, Department of Cardiovascular Medicine, University of Lausanne Medical School, Lausanne, Switzerland

<sup>8</sup> HAYA Therapeutics, Rte de la Corniche 6, 1066 Lausanne, Switzerland

<sup>9</sup> Frankfurt Cancer Institute, Goethe University Frankfurt, Frankfurt am Main, Germany

Corresponding author name(s): Dr. Phillip Grote, [ph.grote@Georg-speyer-haus.de](mailto:ph.grote@Georg-speyer-haus.de)

#### List of Supplementary Material:

Supplementary figures S1 to S6

Supplementary table S1

Rogala, Supplementary Figure 1

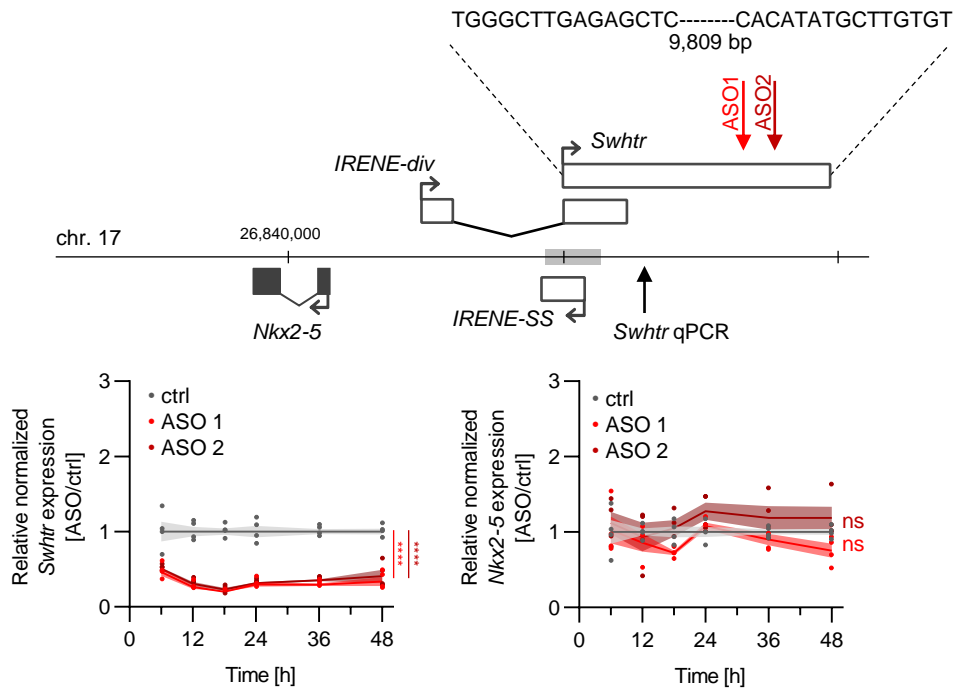

Supplementary Figure 1. **Presence of full length *Swthr* in HL-1 cardiomyocytes.** Outline of the genomic locus. Depicted are the *Swthr* 5' and 3' ends obtained by RACE-PCR. GapmeR mediated knockdown of *Swthr* using two different LNA GapmeRs (ASO 1 and ASO 2) targeting the *Swthr*-3' region, measured with qRT-PCR using 5' located primers as indicated above. Statistical significance assessed by Two-way ANOVA using multiple comparisons with Tukey correction for each timepoint and indicated by asterisks in the respective color. ns = not significant, \*\*\*\* < 0.0001 (n=4)

Rogala, Supplementary Figure 2

**a**

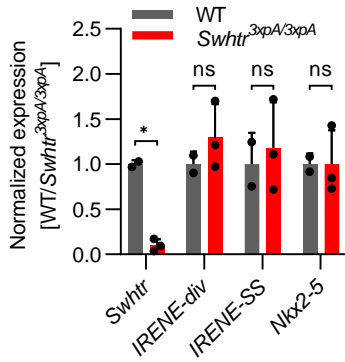

**b**

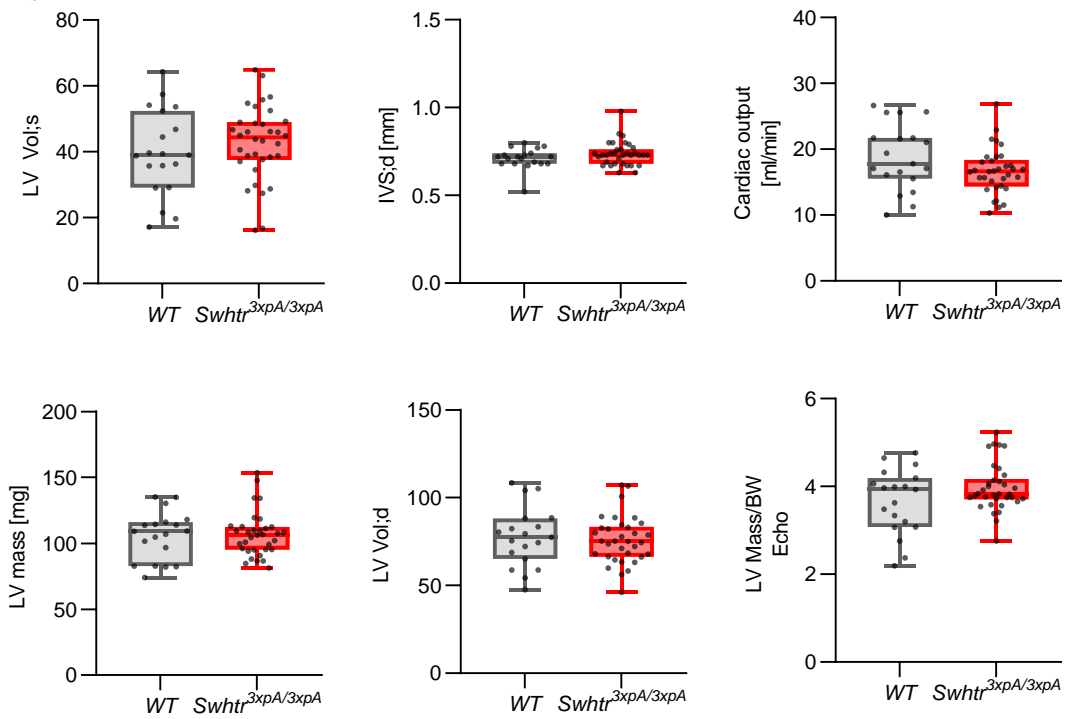

Supplementary Figure 2. **No difference in heart parameters in *Swht1*<sup>3xpA/3xpA</sup> mutant mice.** **a** qRT-PCR analysis of the *IRENE* RNAs in *Swht1*<sup>3xpA/3xpA</sup> mouse hearts. Number of dots indicates number of replicates. **b** Additional heart parameters assessed by echocardiography. No statistically significant differences were detected. Statistical significance was tested by Two-way ANOVA with Tukey correction in case of multiple comparisons. ns = not significant, \* < 0.05

Rogala, Supplementary Figure 3

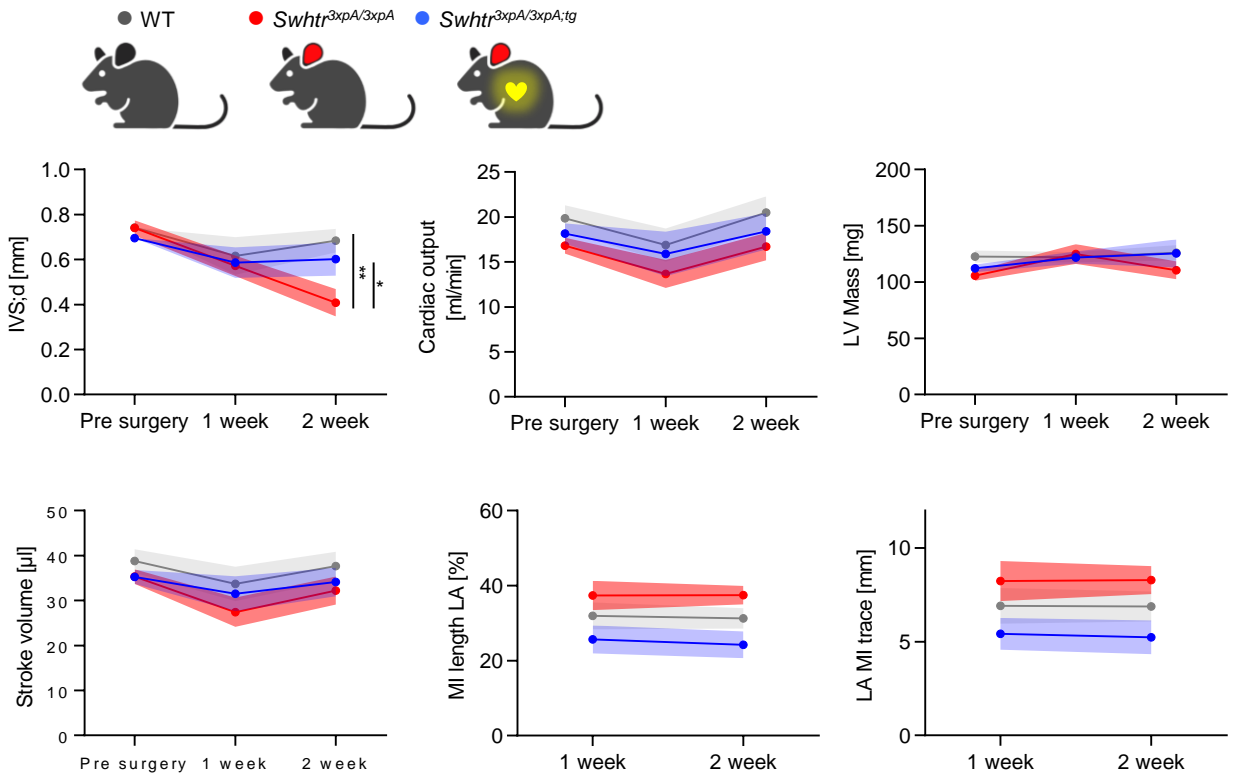

Supplementary Figure 3. **Additional heart parameters after MI.** Statistical significance tested by Two-way ANOVA with Tukey correction for multiple comparisons. No indication implies that no statistically significant difference from the wild type was detected. \* < 0.05, \*\* < 0.01 (n=9 animals per genotype). The color key for the genotype was generated using BioRender.com.

Rogala, Supplementary Figure 4

a

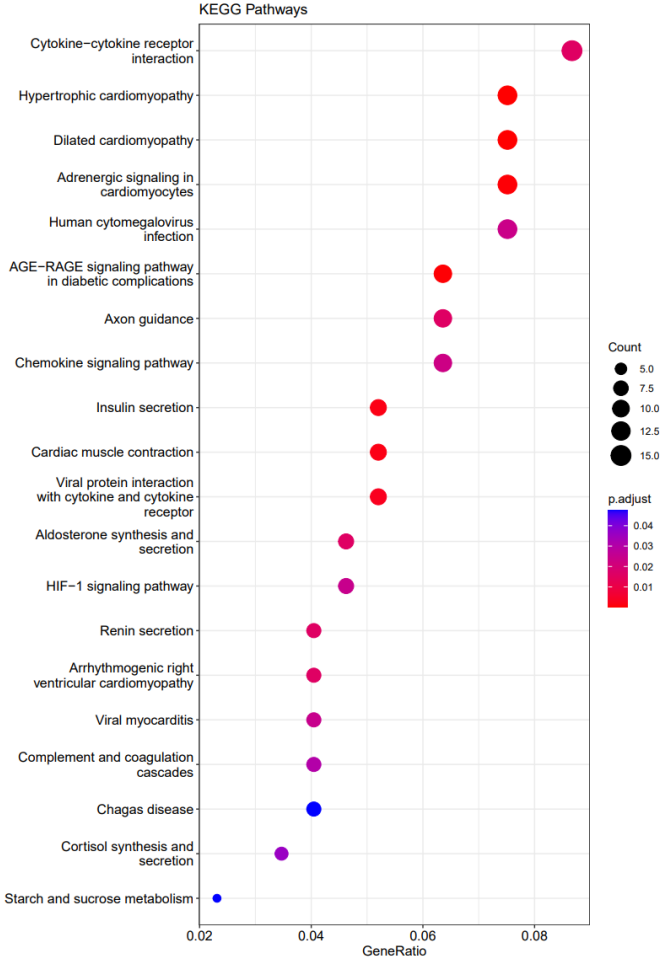

b

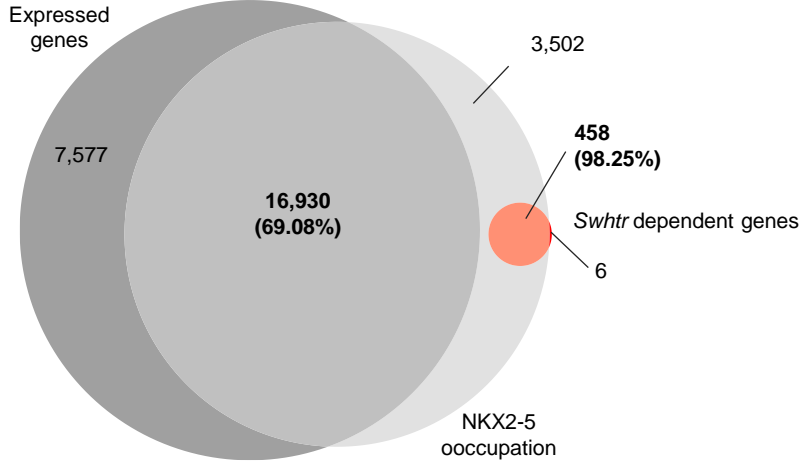

Supplementary Figure 4. **KEGG-pathway-analysis and NKX2-5 occupation.** a KEGG pathway analysis of of *Swthr* dependent genes (464) b VENN diagram of all expressed genes without dysregulated genes (dark grey), NKX2-5 occupied gene bodies (light grey) and the 464 *Swthr* dependent genes (red). The p-value for the *Swthr* dependent genes is 2.780948e-32 by hyper geometric test gmp.

Rogala, Supplementary Figure 5

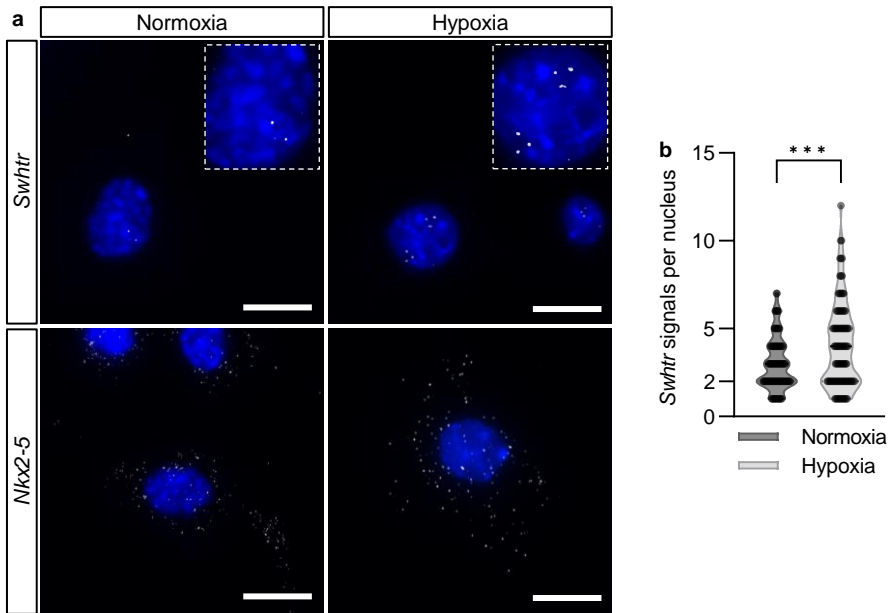

Supplementary Figure 5. ***Swihr* dispersion under hypoxic stress in HL-1 cardiomyocytes.** **a** smFISH stainings of *Swihr* and *Nkx2-5* in HL-1 cardiomyocytes after 24h incubation at normoxic (21% O<sub>2</sub>) or hypoxic (1% O<sub>2</sub>) conditions. The white line represents 10 μm. **b** Quantification of *Swihr* smFISH signals in the nucleus of HL-1 cardiomyocytes after 24h incubation at normoxic (21% O<sub>2</sub>) or hypoxic (1% O<sub>2</sub>) conditions (n > 50). Statistical significance tested by Two-way ANOVA. \*\*\* < 0.001

Rogala, Supplementary Figure 6

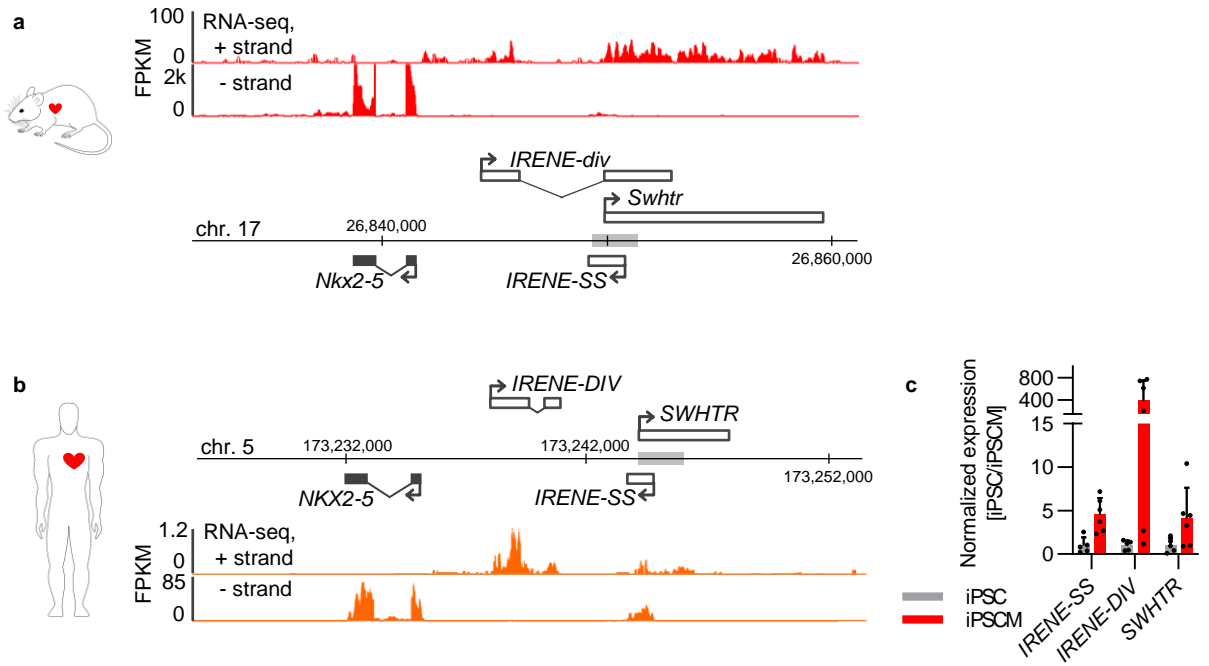

Supplementary Figure 6. **Conservation between human and mouse.** **a** Murine strand-specific RNA sequencing data from the heart generated by us depicting the annotation of the indicated RNAs. **b** Human strand-specific RNA sequencing data from cardiomyocytes from public ENCODE datasets (ENCFF182KCL, ENCFF571PYD) depicting RNA-sequencing derived annotations of the indicated RNAs. **c** qRT-PCR validation of presence of the *NKX2-5* associated lncRNAs in cardiomyocytes (iPSCM) derived from induced pluripotent stem cells (iPSCs) as compared to the undifferentiated condition (iPSC n = 5; iPSCM n = 6).

**Table S1 – related to Materials & Methods**

**Oligos and probes used for indicated experiments**

| qPCR analysis     | Forward               | Reverse                |
|-------------------|-----------------------|------------------------|
| <i>Nkx2-5</i>     | AAGTGCTCTCCTGCTTTCCCA | TTTGTCCAGCTCCACTGCCTT  |
| <i>Swhtr</i>      | CCGCAAACCGAACAACCTCAG | CTGCCTAAGTGGGGGAAGTG   |
| <i>Eaf1</i>       | agagctgtggtgtgcat     | agagagcaaacctggagcc    |
| <i>Tnni1</i>      | CCATGGATCTGCGGGCCAACC | GCGGCCTTCCATGCCAGACA   |
| <i>Cdh5</i>       | TTGGACCGAGAGAAACAGGC  | CTTGCCCACTCGGATGTCTT   |
| <i>Ptprc</i>      | GGCTTCAAGGAACCCAGGAA  | GAGTGCCTTCTCCATGCTT    |
| <i>Ddr2</i>       | AGCGAGGTACAGGACTCCAT  | TCCCCGCTCCTCCTCAATTA   |
| <i>Xist</i>       | agggtgtgtgcatatgga    | ccgccatctttcctgtacg    |
| <i>Snrnp70</i>    | tgctcctcctcaacaagag   | cagagtctgaaggcatcg     |
| <i>Hmbs</i>       | CCTGGGCGGAGTCATGTC    | ACTCGAATCACCTCATCTTTGA |
| <i>IRENE-div</i>  | TGGGAAAGGAGTGTGTGTCTG | GGAGGACCTTGTACTGGCA    |
| <i>IRENE-SS</i>   | TCTCTTTGGTCACTTGGGGC  | GCCGCCGTTTATGCTGTAG    |
| <i>hSWHTR</i>     | GAGAGGGCAGCTTGGACTTT  | CTTCTTTCCCCTCTGCCCTG   |
| <i>hIRENE-DIV</i> | TCGCTTTCAGACTTCCGGTG  | CCAGCGTCTCGATTCTCTCC   |
| <i>hIRENE-SS</i>  | TCAGCTGGCACCAAATCCTT  | CAGTCTCAGCTGTGCAGTCA   |

  

| RACE analysis   | Reverse                             |
|-----------------|-------------------------------------|
| 5' <i>Swhtr</i> | GATTACGCCAAGCTTTCTCCATCCCGCTTTTCACC |
| 3' <i>Swhtr</i> | GATTACGCCAAGCTTATCCCCTGGAAGTGGGGTTA |

  

| smFISH probes | <i>Nkx2-5</i>        | <i>Swhtr</i>         |
|---------------|----------------------|----------------------|
| 1             | ctggagtaggggggattcag | accacttaaacctgattca  |
| 2             | caggtggtagcagagagtg  | atgtgcacctgaaagctg   |
| 3             | gagaaaggcgtgggtgtgag | aaatgctcctttaaggct   |
| 4             | caggtcaggatgtcttga   | gttcacactaattggtgtg  |
| 5             | gaaagcaggagagcacttg  | aaaggccctatcgattact  |
| 6             | taggctcccggtaaaatg   | gaagtggagcagttgaagca |
| 7             | gcgcacagctcttttatc   | caaagagtatctggcctac  |
| 8             | ctgcgagaagagcagcgtg  | gtattgcagccaagaagtga |
| 9             | ggtaccgctgtgcttgaag  | ggcaattggaaggagcaag  |
| 10            | tggacgtgagctcagcag   | ctcagcagtttgagtaatcc |
| 11            | tgaaccagatcttgacctg  | ctacttgtttccgtacaga  |



|    |                      |                       |
|----|----------------------|-----------------------|
| 12 | tcgcttgcaactgtagcgac | aacctttgctattgccaag   |
| 13 | agaagctccagagtctggtc | cctgaaggaaggactagtt   |
| 14 | tttagccataggcattgag  | ctgaacactctgcctaagt   |
| 15 | gacgcaaagttcacgaagt  | tgtagaggaaagacaccc    |
| 16 | gactctgcacggtgtcaag  | taggacaggaagagagccat  |
| 17 | ttctcctaaaggtgggagtc | gaaaaggctaaagtgtccct  |
| 18 | tgggtgtgaaatctgagggg | ttaccaaccaggcactatag  |
| 19 | gggatggatcggagaaaggt | gtcacagagatagagcagga  |
| 20 | acaccaggctacgtcaataa | gtgttcttcgttcagttg    |
| 21 | gtgtggaatccgtcgaaagt | ctagtttcgggtcaagagt   |
| 22 | cgacggcaagacaaccaggg | tcatgaaccacattgcata   |
| 23 | aacataaatacgggtgggtg | gtcaagaatgctcaacctgg  |
| 24 | gagggttctcatttctaca  | gtttcagactgtaggcattt  |
| 25 | gtagcgcactcactttaat  | ctttccattgataggcaga   |
| 26 |                      | gggatactgcctacatatt   |
| 27 |                      | tatcccttggaatttgagt   |
| 28 |                      | ccatccagaatggatagagt  |
| 29 |                      | aaatccatagcattggctgg  |
| 30 |                      | atagctcgattctctagggtg |
| 31 |                      | caacctcaaggccagaagaa  |
| 32 |                      | agactttccttggtgaagg   |
| 33 |                      | aaatcgcttagactgcgtgg  |
| 34 |                      | gacccaaaacaacagccatg  |
| 35 |                      | ctagttctaccaccaagta   |
| 36 |                      | gccaatagttagaacatgc   |
| 37 |                      | ctagaaaccaaagccctact  |
| 38 |                      | ttgtcctgtggactaacac   |
| 39 |                      | tcctgggtgctcaaggtaaaa |
| 40 |                      | gatgtccaggatggaaatgc  |
| 41 |                      | aatacattggaacaccctgc  |
| 42 |                      | ttccaatctgtgcagaagtc  |
| 43 |                      | aggcccaggtaaaagaactc  |
| 44 |                      | ttgttatctattgtgccacg  |
| 45 |                      | atgcattactatagccca    |
| 46 |                      | attcacattatcctgacct   |
| 47 |                      | tatcttattccatgctcact  |
| 48 |                      | tgccaactgaaccagtta    |

| Genotyping            | Forward              | Reverse             | Internal            |
|-----------------------|----------------------|---------------------|---------------------|
| <i>Swltr3xpA/3xpA</i> | CCCGCATGAAGATTCTGGGA | GCCTGAAATGAGCCTTGGA | CAGGTTGGAAGTGGAGCAG |

---

|                          |                     |                      |
|--------------------------|---------------------|----------------------|
| <i>Swthr3xpA/3xpA;tg</i> | TGACCGAGTACAAGCCCAC | GCGCAGACAGGTCCCCAGAC |
|--------------------------|---------------------|----------------------|

---

| WISH probes   | Forward                                       | Reverse                                     |
|---------------|-----------------------------------------------|---------------------------------------------|
| <i>Nkx2-5</i> | aATTTAGGTGACACTATAGAA<br>CAAGTGCTCTCCTGCTTTCC | aTAATACGACTCACTATAGG<br>GTGGAATCCGTCGAAAGT  |
| <i>Swthr</i>  | aATTTAGGTGACACTATAGAA<br>AATCTTTGGGCCAGGACTTT | aTAATACGACTCACTATAGG<br>TCCACCTCTTTTCCATTGC |

---

| Antisense LNA GapmeRs     | Sequence         |
|---------------------------|------------------|
| <i>Swthr</i> ASO1         | TAGGATTGAGAGACGT |
| <i>Swthr</i> ASO2         | TTCGATGGATCATTAA |
| GapmeR negative control A | AACACGTCTATACGC  |

---
